# Supplementary material for: Molecular Strategies for Intensity-Dependent Olfactory Processing in Caenorhabditis elegans
Source: PubMed Central journal article supplement (PMC8600271; doi:10.3389/fnmol.2021.748214), 2021-11-04
Supplement: Data_Sheet_1.pdf [file Data_Sheet_1.pdf]

## SUPPLEMENTAL INFORMATION

|                   | Odor induced current |               |                | Wash induced current |               |                |
|-------------------|----------------------|---------------|----------------|----------------------|---------------|----------------|
|                   | Latency (ms)         | Rise time (s) | Decay time (s) | Latency (ms)         | Rise time (s) | Decay time (s) |
| AWC (TAX-2/TAX-4) | $195.7 \pm 30.3$     | $0.4 \pm 0.1$ | —              | $1252.3 \pm 353.4$   | $1.4 \pm 0.3$ | $9.9 \pm 1.3$  |
| ASH (OSM-9)       | $487.9 \pm 138.8$    | $2 \pm 0.3$   | $15.8 \pm 2.8$ | N.A.                 |               |                |

**Table S1. Biophysical Properties of IAA-induced Currents from AWC and ASH Neurons. Related to Figure 1.**

The rise times and decay times were obtained from 10% to 90% of the peak amplitude.  
Voltage: -70 mV.  $n \geq 5$ .

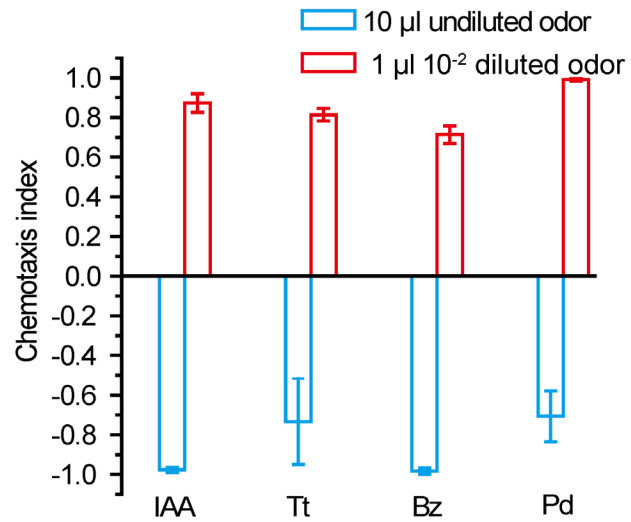

**Figure S1. Odorants Which Are Attractive in Low Concentration Elicit Avoidance Response with High Concentration in *C. elegans*. Related to Figure 1.**

Odorants were diluted with ethanol. IAA, isoamyl alcohol; Tt, 2,4,5-trimethylthiazole; Bz, benzaldehyde; Pd, 2,3-pentanedione. N = 3. Error bars: SEM.

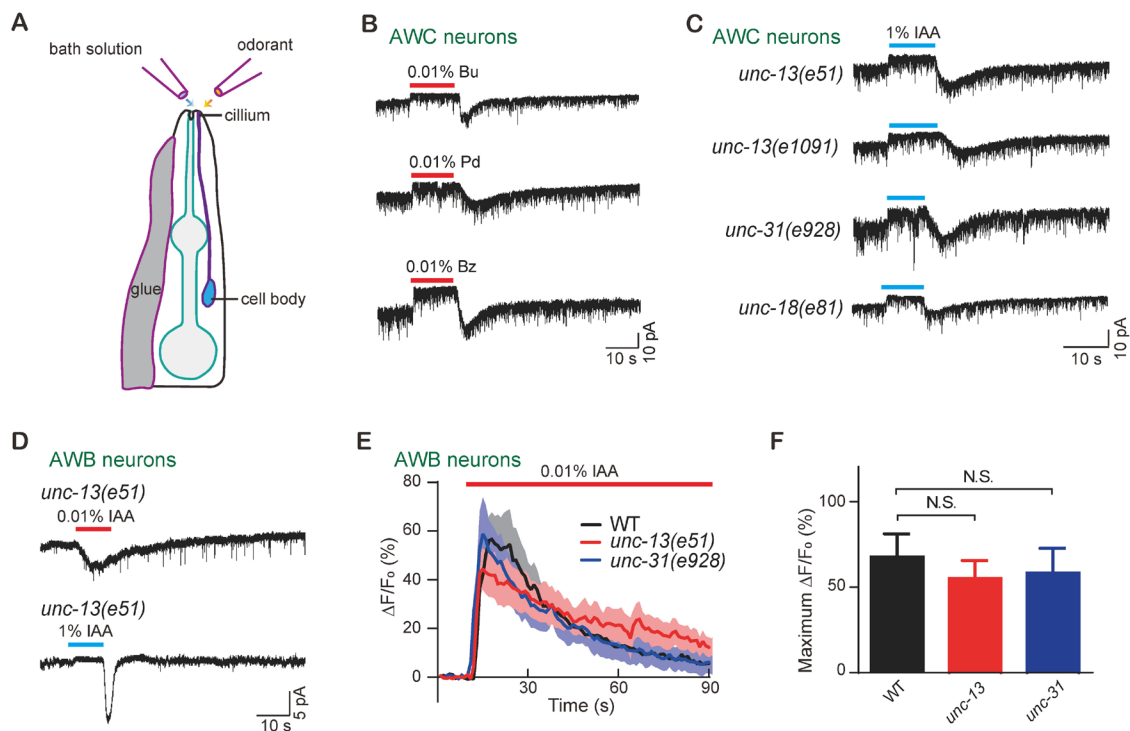

**Figure S2. IAA induced Responses in AWC and AWB Neurons. Related to Figure 1.**

(A) A schematic drawing of the calcium imaging and electrophysiological recording of odorant-induced responses in *C. elegans* olfactory neurons.

(B) Representative traces show olfactory currents from AWC neurons induced by 0.01% Bu (AWC<sup>ON</sup>), 0.01% Bz (AWC<sup>ON</sup> and AWC<sup>OFF</sup>), and 0.01% Pd (AWC<sup>OFF</sup>). Bz, benzaldehyde. Pd, 2,3-pentanedione. Bu, butanone.

(C) 1% IAA-induced currents in AWC neurons in *unc-13(e51)*, *unc-13(e1091)*, *unc-31(e928)* and *unc-18(e81)* mutants were equal to that in wild-type animals.  $n \geq 4$ .

(D) IAA-induced currents in AWB neurons in *unc-13* mutants.  $n \geq 7$ .

(E and F) 0.01% IAA-induced calcium responses in AWB neurons in *unc-13(e51)* and *unc-31(e928)* mutants.  $n \geq 7$ .

For patch-clamp recording, the cell membrane potential was voltage-clamped at -70 mV. Error bars: SEM. N.S.: not s
